# Supplementary material for: Lifetime risk of atrial fibrillation according to optimal, borderline, or elevated levels of risk factors: cohort study based on longitudinal data from the Framingham Heart Study
Source: PubMed Central journal article supplement — BMJ. 2018 Apr 26;361:k1453. doi: 10.1136/bmj.k1453 (PMC5917175; doi:10.1136/bmj.k1453), 2018-04-26
Supplement: stal041331.ww.pdf [file stal041331.ww.pdf]

## Lifetime risk of atrial fibrillation according to levels of risk factors

### Supplementary material

- Suppl. Methods:** Statistical methods for lifetime risk prediction model and multiple imputation.
- Suppl. Figure 1:** Selection of the study sample with index age 65 years.
- Suppl. Figure 2:** Selection of the study sample with index age 75 years.
- Suppl. Figure 3:** Cumulative risk for atrial fibrillation according to risk factor burden (optimal, borderline, or elevated) at index age 65 years.
- Suppl. Figure 4:** Cumulative risk for atrial fibrillation according to risk factor burden (optimal, borderline, or elevated) at index age 75 years.
- Suppl. Figure 5:** Calibration plot of the prediction model for predicting lifetime risk at index age 55 years.
- Suppl. Table 1:** Characteristics for smoking divided into optimal, borderline, and elevated.
- Suppl. Table 2:** Lifetime risk of atrial fibrillation by single risk factor and sex, adjusted for the competing risk of death at index age 55 years.
- Suppl. Table 3:** Lifetime risk of atrial fibrillation by single risk factor and sex, adjusted for the competing risk of death at index age 65 years.
- Suppl. Table 4:** Lifetime risk of atrial fibrillation by single risk factor and sex, adjusted for the competing risk of death at index age 75 years.
- Suppl. Table 5:** Distribution of risk factor categories.
- Suppl. Table 6:** Lifetime risk of atrial fibrillation by risk factor profile, adjusted for the competing risk of death in men.
- Suppl. Table 7:** Lifetime risk of atrial fibrillation by risk factor profile, adjusted for the competing risk of death in women.
- Suppl. Table 8:** Multivariable prediction model of the lifetime risk of atrial fibrillation at age index 55 years.
- Suppl. Table 9:** Lifetime risk AF by single risk factor, unadjusted for the competing risk of death.
- Suppl. Table 10:** Lifetime risk of atrial fibrillation at index age 55 years according to burden of risk factors with multiple imputation.
- Suppl. Table 11:** Lifetime risk of atrial fibrillation by BMI adjusted for the competing risk of death excluding underweighted individuals.

## Lifetime risk of atrial fibrillation according to levels of risk factors

**Suppl. Methods.** Statistical methods for lifetime risk prediction model and multiple imputation.

### *Statistical methods for the atrial fibrillation lifetime risk prediction model*

We developed a prediction model for the lifetime risk of atrial fibrillation (AF) at the index age 55 years. We used a multivariable Fine-Gray model accounting for the competing risk of death.[1] We included 9 covariates: Body mass index (BMI), systolic blood pressure, and diastolic blood pressure as continuous variables, and sex, smoking (never, past, or current), alcohol intake (optimal or elevated), diabetes (optimal, borderline, or elevated), treatment for hypertension, and history of myocardial infarction or heart failure as categorical variables. We did not perform any variable selection. We checked the assumptions of the Fine and Gray model.[2] We used goodness-of-fit test procedures based on the cumulative sums of residuals to assess the linear functional forms for BMI, systolic blood pressure, and diastolic blood pressure. All were satisfied. We also tested the proportionality of subdistribution hazards for the Fine and Gray model.[2,3] We found that the proportional hazards assumption was violated for BMI, sex, smoking, and history of myocardial infarction or heart failure. As a consequence, we added time-varying covariates  $Z \times \log(t)$  to the model, i.e. an interaction term between each of these 4 covariates and the natural logarithmic transformation of time.

We used the cumulative subdistribution baseline hazard and the estimated regression coefficients of the Fine and Gray model to derive the predicted cumulative incidence of AF at age 95 years for 16 risk profiles, in men and women separately.[4] We defined the profiles according to treatment for hypertension (yes or no), BMI (25 kg/m<sup>2</sup> or 35 kg/m<sup>2</sup>), alcohol (elevated or optimal), and history of myocardial infarction or heart failure (yes or no). For each profile, we considered a participant with an average blood pressure level (mean systolic blood pressure 128 mm Hg and 124 mm Hg and mean diastolic blood pressure 80 mm Hg and 76 mm Hg for men and women respectively), who never smoked, and had no diabetes. Finally, we assessed the calibration and discrimination of the model. We plotted the AF lifetime risk estimate, computed within deciles of the predicted lifetime risk, against the average of the predicted AF lifetime risk within the same deciles.[5] We assessed discrimination by the c-index adapted for competing risk data.[6] These analyses were conducted in R 3.3.2 *cmprsk*, *crskdiag*, and *pec* packages.

## Lifetime risk of atrial fibrillation according to levels of risk factors

### *Multiple imputation analysis*

We included 6778 participants (1201 AF cases), as compared to 5338 participants (489 AF cases) in the complete case analysis. Data were missing for the following 7 risk factors: diabetes (categorical; proportion of missing values 20.4%), BMI (continuous; 5.5%), smoking (categorical; 5.3%), treatment for hypertension (binary; 5.2%), systolic blood pressure (continuous; 0.1%), diastolic blood pressure (continuous; 0.1%), and alcohol (binary; 1.1%). We generated 25 imputed datasets by multiple imputation predictive mean matching method.[7] We included the following covariates in the predictive mean matching model: sex, age, BMI, diabetes, smoking, alcohol, systolic blood pressure, diastolic blood pressure, treatment for hypertension, history of myocardial infarction or heart failure. In addition, we used a generalization of the method proposed by White and Royston:[8] we included the outcome status variable (AF, death, censored), as well as the estimated subdistribution cumulative baseline hazards for AF and death, in the predictive mean matching model. In each imputed dataset, we categorized individuals into optimal, borderline, and elevated aggregated risk categories. The mean percentage, across the 25 imputed datasets, of individuals categorized into optimal, borderline, and elevated groups were 4.1%, 24.7%, and 71.2%, respectively. In each of the 25 imputed datasets, we estimated the lifetime risk at index age 55 years, and the associated standard error, for the optimal, borderline, and elevated risk categories, respectively. For each risk category, we combined the 25 estimates according to Rubin's rules.[9] Finally, we compared the multiple imputation analysis results with the complete case analysis results. The multiple imputation analysis was conducted by R 3.3.2 *cmprsk*, *survival*, *mice*, and *Amelia* packages.

## Lifetime risk of atrial fibrillation according to levels of risk factors

**Suppl. Figure 1.** Selection of the study sample with index age 65 years.

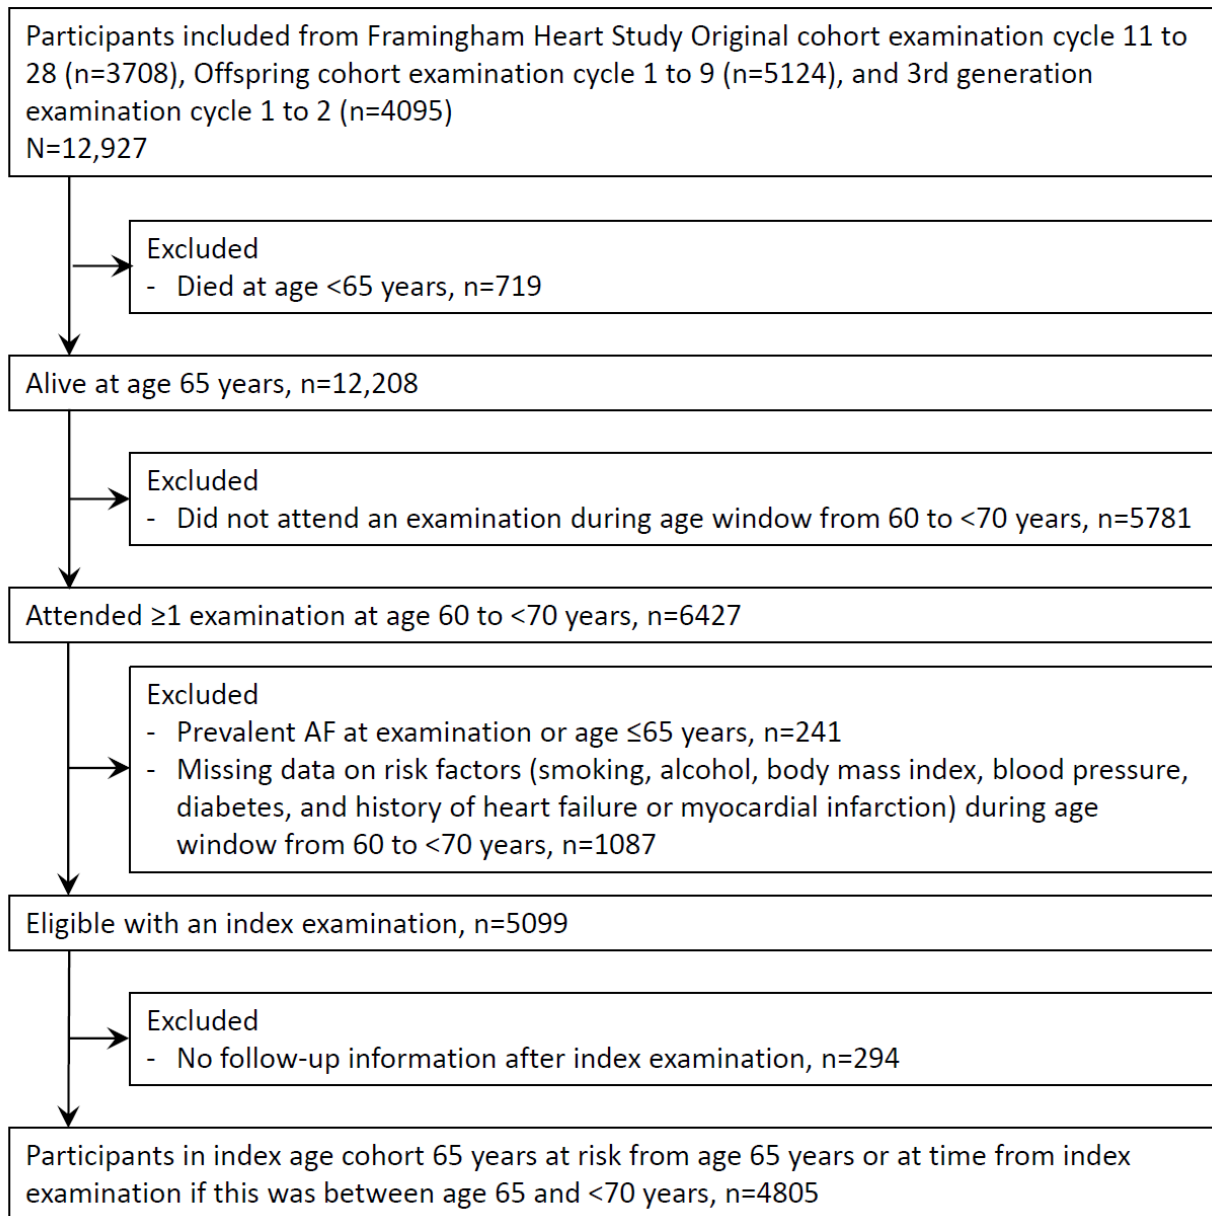

## Lifetime risk of atrial fibrillation according to levels of risk factors

**Suppl. Figure 2.** Selection of the study sample with index age 75 years.

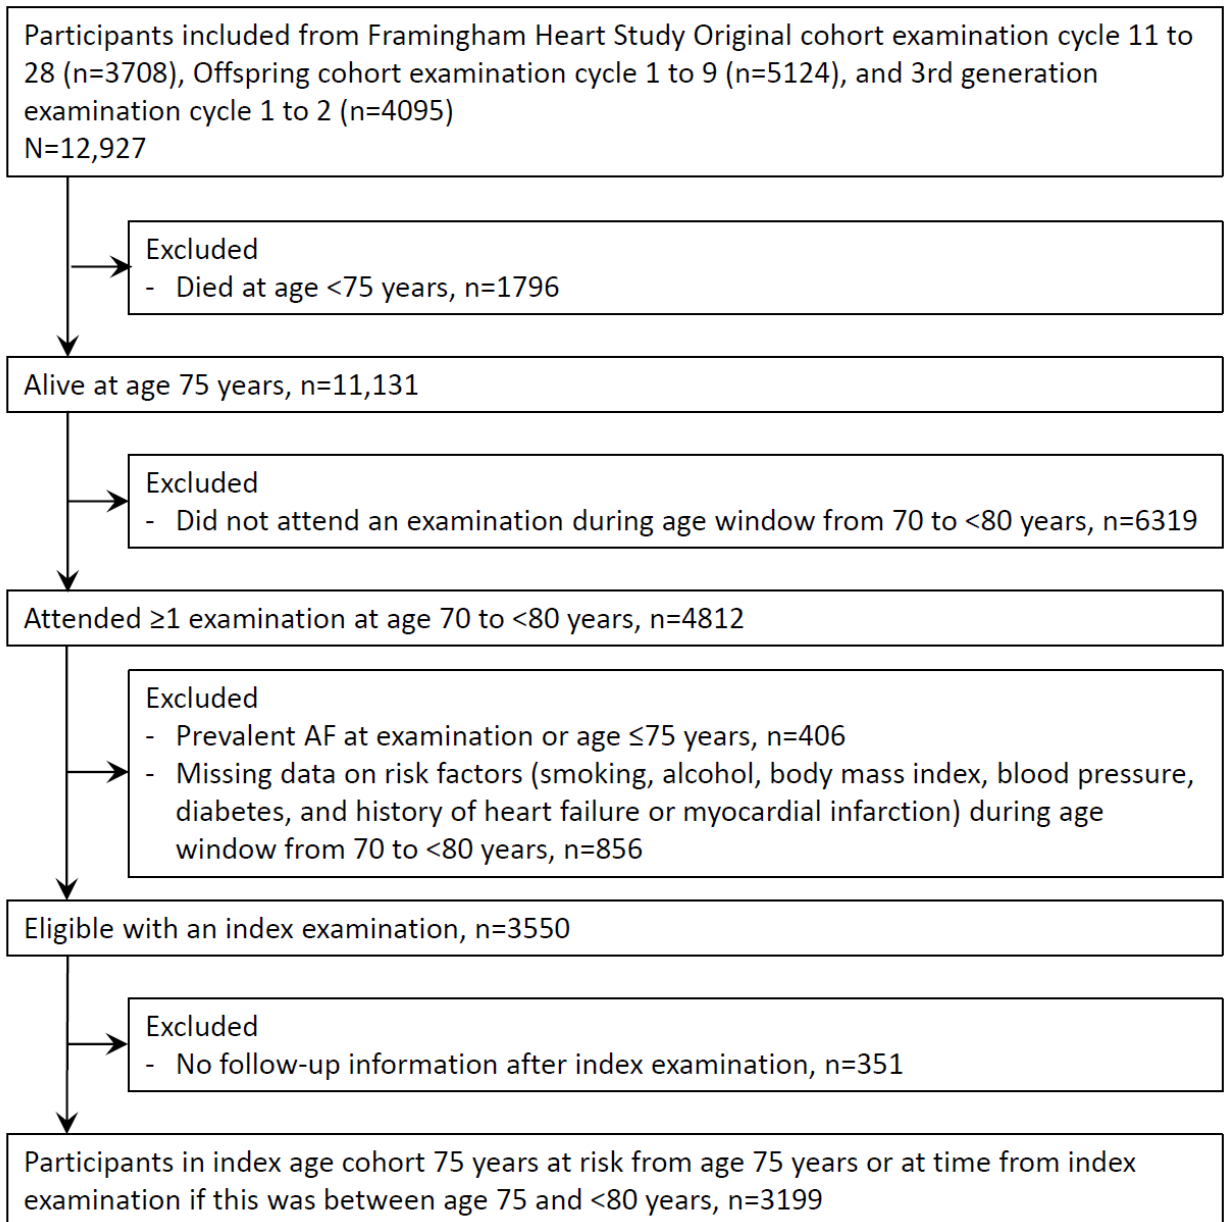

### Lifetime risk of atrial fibrillation according to levels of risk factors

**Suppl. Figure 3.** Cumulative risk for atrial fibrillation according to risk factor burden (optimal, borderline, or elevated) at index age 65 years.

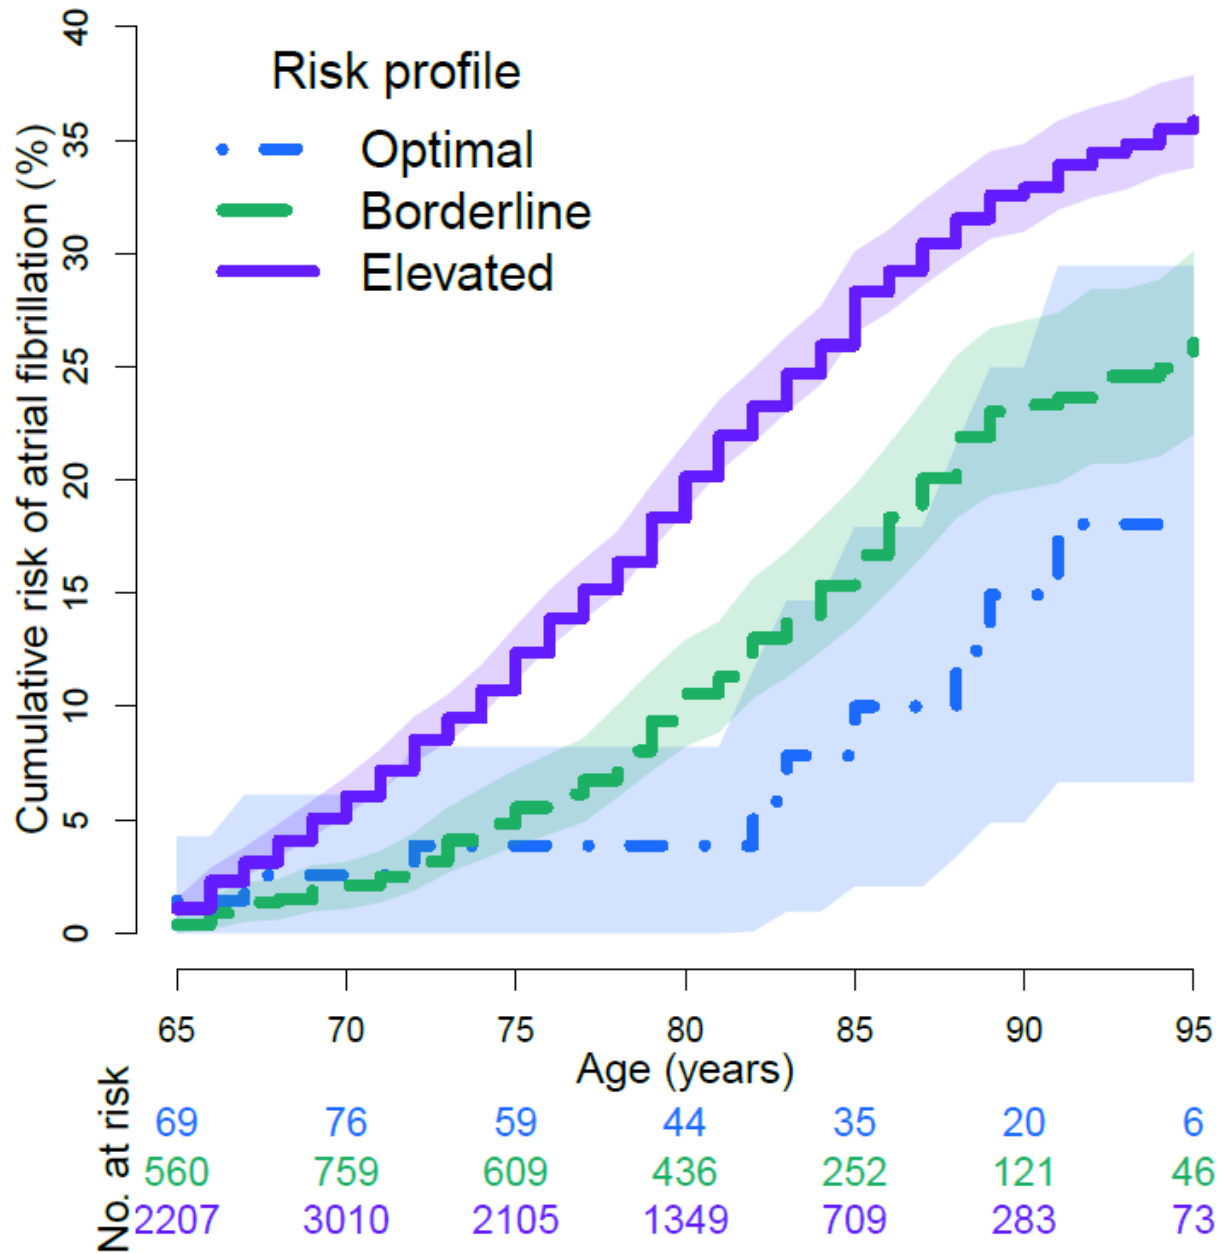

Shadings are 95% confidence boundaries. Participants entered the study sample between age 65 and 70 years; therefore, the number at risk increased from age 65 years to age 70 years.

## Lifetime risk of atrial fibrillation according to levels of risk factors

**Suppl. Figure 4.** Cumulative risk for atrial fibrillation according to risk factor burden (optimal, borderline, or elevated) at index age 75 years.

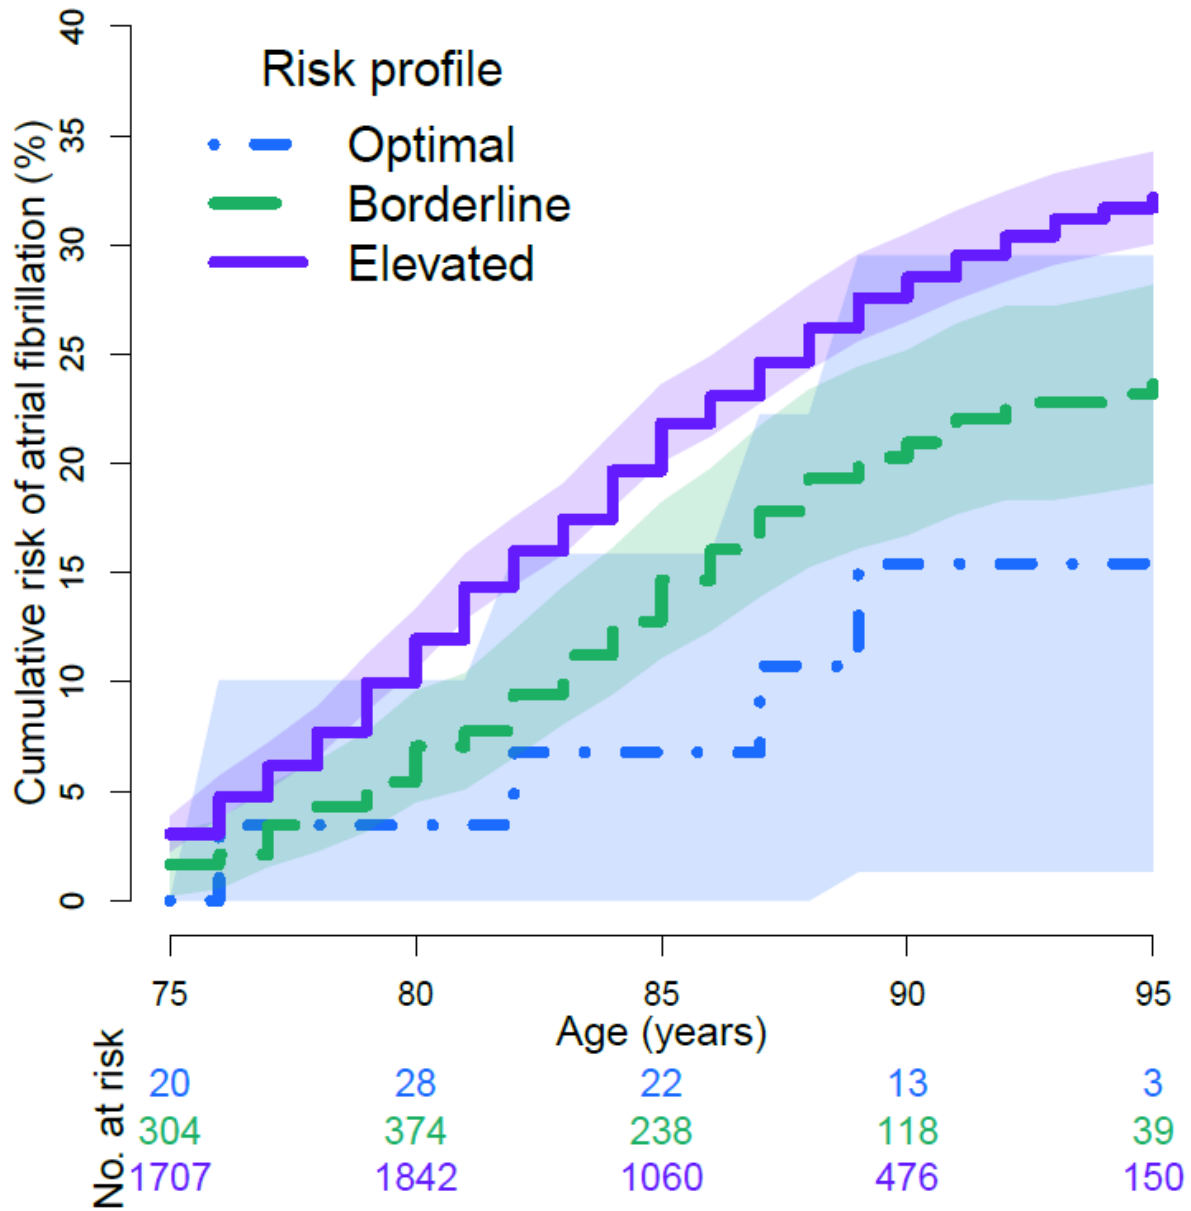

Shadings are 95% confidence boundaries. Participants entered the study sample between age 75 and 80 years; therefore, the number at risk increased from age 75 years to age 80 years.

## Lifetime risk of atrial fibrillation according to levels of risk factors

**Suppl. Figure 5.** Calibration plot of the prediction model for predicting lifetime risk at index age 55 years.

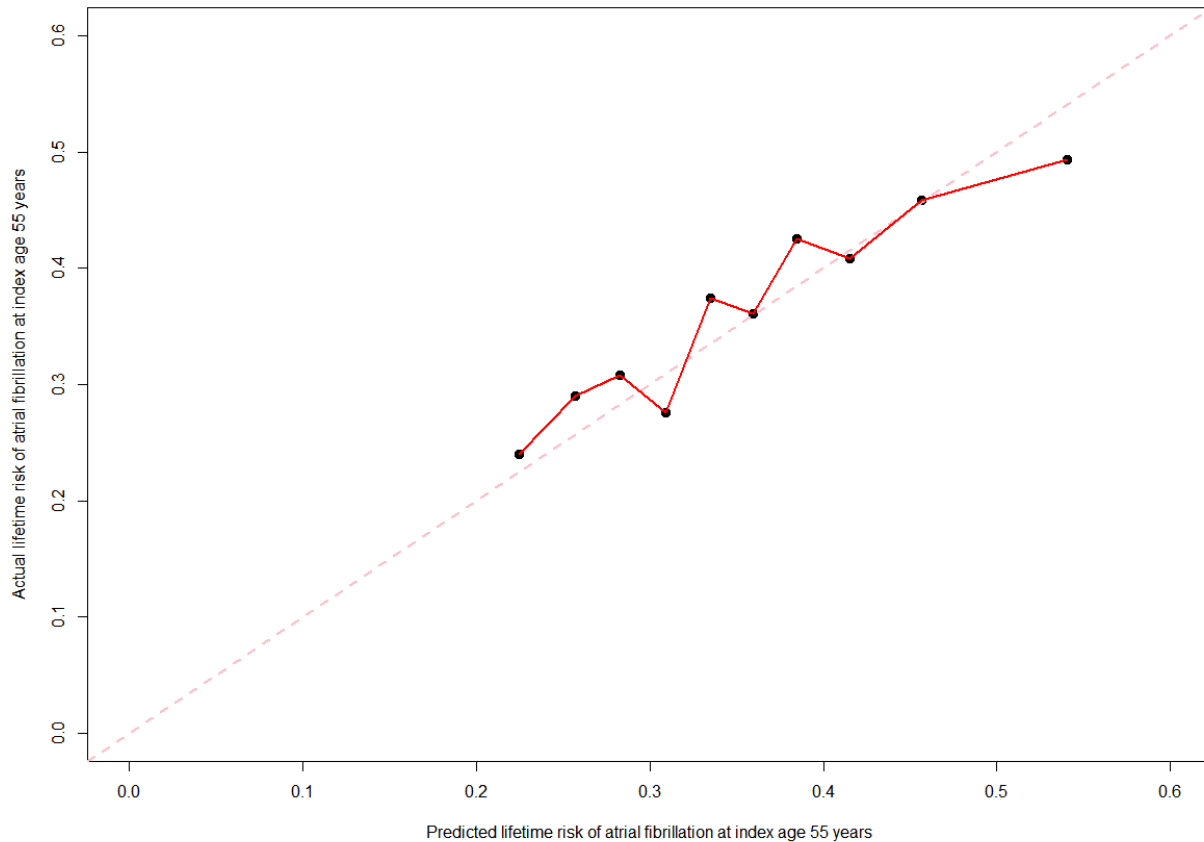

X-axis is the mean lifetime risk by Fine and Gray model adjusting competing risk of death, y-axis is the actual lifetime risk calculated by *cuminc* function in R *cmprsk* package in each decile of predicted lifetime risk.

Calibration was good, although the lifetime risk is slightly underestimated for moderate lifetime risk groups and overestimated for participants in the highest lifetime risk group. In addition, the C index for lifetime risk at index age 55 years adjusting competing risk of death is 59.4%, indicating relatively poor discrimination; but discrimination was hampered by the fact that the risk factors are also associated with the competing risk of death.



## Lifetime risk of atrial fibrillation according to levels of risk factors

**Suppl. Table 1.** Characteristics of participants according to smoking divided into optimal, borderline, and elevated.

|                                                                | <b>Index age 55 years</b> |                   |                   |
|----------------------------------------------------------------|---------------------------|-------------------|-------------------|
|                                                                | <b>Optimal</b>            | <b>Borderline</b> | <b>Elevated</b>   |
| Number of participants                                         | 1935                      | 2275              | 1128              |
| Male                                                           | 822 (42.5)                | 1170 (51.4)       | 539 (47.8)        |
| Age, mean (SD)                                                 | 55 (2.1)                  | 55 (1.9)          | 55 (1.9)          |
| Calendar year for Framingham Heart Study exam, median (Q1, Q3) | 1998 (1986, 2008)         | 1996 (1986, 2004) | 1988 (1981, 1998) |
| Follow up, median (Q1, Q3)                                     | 13 (5, 23)                | 14 (8, 21)        | 16 (9, 24)        |
| Alcohol in elevated                                            | 245 (12.7)                | 470 (20.7)        | 340 (30.1)        |
| Body mass index (kg/m <sup>2</sup> )                           | 27.8 (5.4)                | 28.0 (5.3)        | 26.6 (4.8)        |
| Systolic blood pressure (mm Hg)                                | 125 (17)                  | 126 (17)          | 128 (19)          |
| Diastolic blood pressure (mm Hg)                               | 78 (10)                   | 78 (10)           | 78 (10)           |
| Diabetes                                                       | 123 (6.4)                 | 156 (6.9)         | 67 (6.0)          |
| History of heart failure or myocardial infarction              | 65 (3.4)                  | 122 (5.4)         | 82 (7.3)          |
|                                                                | <b>Index age 65 years</b> |                   |                   |
|                                                                | <b>Optimal</b>            | <b>Borderline</b> | <b>Elevated</b>   |
| Number of participants                                         | 1570                      | 2414              | 821               |
| Male                                                           | 537 (34.2)                | 1252 (51.9)       | 337 (41.1)        |
| Age, mean (SD)                                                 | 65 (1.6)                  | 65 (1.7)          | 65 (1.6)          |
| Calendar year for Framingham Heart Study exam, median (Q1, Q3) | 1994 (1982, 2006)         | 1996 (1983, 2006) | 1984 (1979, 1995) |
| Follow up, median (Q1, Q3)                                     | 13 (6, 19)                | 11 (5, 17)        | 12 (6, 18)        |
| Alcohol in elevated                                            | 177 (11.3)                | 528 (21.9)        | 243 (29.6)        |
| Body mass index (kg/m <sup>2</sup> )                           | 27.9 (5.0)                | 28.0 (5.0)        | 26.1 (4.7)        |
| Systolic blood pressure (mm Hg)                                | 133 (18)                  | 133 (18)          | 135 (20)          |
| Diastolic blood pressure (mm Hg)                               | 76 (10)                   | 77 (10)           | 76 (10)           |

**Lifetime risk of atrial fibrillation according to levels of risk factors**

|                                                   |           |            |            |
|---------------------------------------------------|-----------|------------|------------|
| Diabetes                                          | 155 (9.9) | 289 (12.0) | 75 (9.1)   |
| History of heart failure or myocardial infarction | 141 (9.0) | 319 (13.2) | 109 (13.3) |

**Index age 75 years**

|                                                                | <b>Optimal</b>    | <b>Borderline</b> | <b>Elevated</b>   |
|----------------------------------------------------------------|-------------------|-------------------|-------------------|
| Number of participants                                         | 1233              | 1667              | 299               |
| Male                                                           | 329 (26.7)        | 856 (51.4)        | 106 (35.5)        |
| Age, mean (SD)                                                 | 75 (1.6)          | 75 (1.6)          | 74 (1.8)          |
| Calendar year for Framingham Heart Study exam, median (Q1, Q3) | 1991 (1982, 2000) | 1993 (1986, 2005) | 1987 (1981, 1994) |
| Alcohol in elevated                                            | 92 (7.5)          | 281 (16.9)        | 59 (19.7)         |
| Follow up, median (Q1, Q3)                                     | 9 (5, 14)         | 7 (3, 12)         | 7 (3, 11)         |
| Body mass index (kg/m <sup>2</sup> )                           | 27.2 (4.8)        | 27.3 (4.6)        | 25.0 (4.4)        |
| Systolic blood pressure (mm Hg)                                | 142 (20)          | 139 (20)          | 140 (22)          |
| Diastolic blood pressure (mm Hg)                               | 74 (10)           | 73 (10)           | 73 (11)           |
| Diabetes                                                       | 144 (11.7)        | 200 (12.0)        | 22 (7.4)          |
| History of heart failure or myocardial infarction              | 206 (16.7)        | 325 (19.5)        | 45 (15.1)         |

**Lifetime risk of atrial fibrillation according to levels of risk factors**

**Suppl. Table 2.** Lifetime risk of atrial fibrillation by single risk factor and sex, adjusted for the competing risk of death at index age 55 years.

| Risk factor            | All            |                       |          | Men            |                       |          | Women          |                       |          |
|------------------------|----------------|-----------------------|----------|----------------|-----------------------|----------|----------------|-----------------------|----------|
|                        | AF cases/total | Lifetime risk (95%CI) | p value* | AF cases/total | Lifetime risk (95%CI) | p value* | AF cases/total | Lifetime risk (95%CI) | p value* |
| <b>Smoking</b>         |                |                       |          |                |                       |          |                |                       |          |
| Optimal                | 249/1935       | 38.1 (33.2-43.1)      | 0.23     | 116/822        | 43.0 (34.4-51.5)      | 0.28     | 133/1113       | 35.7 (29.6-41.8)      | 0.71     |
| Borderline             | 343/2275       | 39.3 (34.9-43.6)      |          | 245/1170       | 43.3 (38.3-48.4)      |          | 98/1105        | 33.3 (25.3-41.4)      |          |
| Elevated               | 224/1128       | 32.1 (28.2-36.1)      |          | 128/539        | 36.4 (31.0-41.9)      |          | 96/589         | 28.3 (22.8-33.8)      |          |
| <b>Alcohol</b>         |                |                       |          |                |                       |          |                |                       |          |
| Optimal                | 600/4283       | 35.1 (32.2-38.0)      | 0.0002   | 345/1957       | 40.1 (35.9-44.3)      | 0.006    | 255/2326       | 30.8 (26.8-34.8)      | 0.11     |
| Elevated               | 216/1055       | 40.9 (36.1-45.7)      |          | 144/574        | 43.7 (37.8-49.5)      |          | 72/481         | 37.0 (29.2-44.9)      |          |
| <b>Body mass index</b> |                |                       |          |                |                       |          |                |                       |          |
| Optimal                | 236/1785       | 31.6 (27.5-35.7)      | <0.0001  | 91/526         | 34.0 (27.4-40.5)      | <0.0001  | 145/1259       | 30.4 (25.3-35.4)      | 0.002    |
| Borderline             | 343/2136       | 38.2 (34.0-42.4)      |          | 247/1266       | 41.9 (37.0-46.9)      |          | 96/870         | 32.1 (24.8-39.5)      |          |
| Elevated               | 237/1417       | 44.2 (38.5-50.0)      |          | 151/739        | 48.1 (40.7-55.5)      |          | 86/678         | 39.4 (30.9-47.9)      |          |
| <b>Blood pressure</b>  |                |                       |          |                |                       |          |                |                       |          |
| Optimal                | 152/1539       | 29.0 (24.2-33.9)      | <0.0001  | 75/524         | 38.3 (30.3-46.3)      | 0.0008   | 77/1015        | 23.4 (17.6-29.2)      | 0.002    |
| Borderline             | 272/1792       | 36.5 (32.0-41.0)      |          | 167/927        | 41.0 (35.1-46.9)      |          | 105/865        | 31.5 (25.0-38.0)      |          |
| Elevated               | 392/2007       | 41.1 (37.2-44.9)      |          | 247/1080       | 42.9 (37.9-47.8)      |          | 145/927        | 38.8 (32.9-44.8)      |          |

**Lifetime risk of atrial fibrillation according to levels of risk factors**

**Diabetes**

|            |          |                  |      |          |                  |      |          |                  |      |
|------------|----------|------------------|------|----------|------------------|------|----------|------------------|------|
| Optimal    | 624/3805 | 36.5 (33.7-39.4) | 0.02 | 351/1599 | 41.2 (37.2-45.1) | 0.51 | 273/2206 | 32.5 (28.5-36.4) | 0.23 |
| Borderline | 128/1187 | 38.0 (24.6-51.5) |      | 94/713   | 52.2 (36.2-68.1) |      | 34/474   | 24.4 (13.8-35.1) |      |
| Elevated   | 64/346   | 34.8 (27.3-42.4) |      | 44/219   | 37.5 (27.7-47.3) |      | 20/127   | 31.2 (19.2-43.3) |      |

**History of heart failure or myocardial infarction**

|          |          |                  |         |          |                  |      |          |                  |      |
|----------|----------|------------------|---------|----------|------------------|------|----------|------------------|------|
| Optimal  | 747/5069 | 37.0 (34.3-39.8) | <0.0001 | 438/2344 | 41.9 (38.1-45.6) | 0.01 | 309/2725 | 32.6 (28.7-36.5) | 0.05 |
| Elevated | 69/269   | 37.3 (29.1-45.4) |         | 51/187   | 36.7 (27.6-45.8) |      | 18/82    | 36.5 (21.1-51.8) |      |

---

The p values for interaction between sex and each risk factor were all <0.0001.

\*overall test comparing sub-distribution hazards across risk categories by Fine and Gray method.

**Lifetime risk of atrial fibrillation according to levels of risk factors**

**Suppl. Table 3.** Lifetime risk of atrial fibrillation by single risk factor and sex, adjusted for the competing risk of death at index age 65 years.

| Risk factor            | All            |                       |          | Men            |                       |          | Women          |                       |          |
|------------------------|----------------|-----------------------|----------|----------------|-----------------------|----------|----------------|-----------------------|----------|
|                        | AF cases/total | Lifetime risk (95%CI) | p value* | AF cases/total | Lifetime risk (95%CI) | p value* | AF cases/total | Lifetime risk (95%CI) | p value* |
| <b>Smoking</b>         |                |                       |          |                |                       |          |                |                       |          |
| Optimal                | 316/1570       | 33.7 (30.4-36.9)      | 0.009    | 115/537        | 38.6 (32.5-44.7)      | 0.06     | 201/1033       | 31.6 (27.8-35.4)      | 0.62     |
| Borderline             | 525/2414       | 36.3 (33.6-39.1)      |          | 339/1252       | 41.1 (37.4-44.8)      |          | 186/1162       | 30.5 (26.5-34.5)      |          |
| Elevated               | 182/821        | 27.5 (24.0-31.0)      |          | 81/337         | 28.6 (23.1-34.0)      |          | 101/484        | 26.8 (22.2-31.4)      |          |
| <b>Alcohol</b>         |                |                       |          |                |                       |          |                |                       |          |
| Optimal                | 799/3857       | 33.2 (31.2-35.3)      | 0.05     | 405/1669       | 37.7 (34.6-40.9)      | 0.15     | 394/2188       | 29.9 (27.3-32.6)      | 0.39     |
| Elevated               | 224/948        | 35.6 (31.6-39.5)      |          | 130/457        | 39.7 (34.1-45.4)      |          | 94/491         | 31.5 (26.0-37.0)      |          |
| <b>Body mass index</b> |                |                       |          |                |                       |          |                |                       |          |
| Optimal                | 314/1537       | 29.9 (27.0-32.8)      | <0.0001  | 117/476        | 33.4 (28.1-38.7)      | 0.01     | 197/1061       | 28.3 (24.8-31.8)      | 0.002    |
| Borderline             | 422/2008       | 33.3 (30.5-36.1)      |          | 265/1056       | 37.9 (34.0-41.8)      |          | 157/952        | 28.1 (24.2-32.0)      |          |
| Elevated               | 287/1260       | 40.7 (36.7-44.8)      |          | 153/594        | 44.9 (38.9-50.8)      |          | 134/666        | 37.5 (32.0-43.0)      |          |
| <b>Blood pressure</b>  |                |                       |          |                |                       |          |                |                       |          |
| Optimal                | 118/778        | 27.5 (22.9-32.1)      | <0.0001  | 61/283         | 34.5 (26.7-42.2)      | 0.04     | 57/495         | 23.2 (17.5-28.9)      | <0.0001  |
| Borderline             | 254/1303       | 30.2 (26.9-33.5)      |          | 140/579        | 36.3 (31.2-41.5)      |          | 114/724        | 25.3 (21.1-29.5)      |          |
| Elevated               | 651/2724       | 37.1 (34.6-39.5)      |          | 334/1264       | 40.1 (36.4-43.7)      |          | 317/1460       | 34.7 (31.4-37.9)      |          |

**Lifetime risk of atrial fibrillation according to levels of risk factors**

**Diabetes**

|            |          |                  |        |          |                  |      |          |                  |      |
|------------|----------|------------------|--------|----------|------------------|------|----------|------------------|------|
| Optimal    | 726/3137 | 32.8 (30.8-34.8) | 0.0007 | 345/1221 | 37.2 (33.9-40.4) | 0.08 | 381/1916 | 29.8 (27.2-32.4) | 0.04 |
| Borderline | 171/1149 | 32.9 (27.0-38.7) |        | 109/602  | 33.9 (27.8-40)   |      | 62/547   | 32.2 (21.8-42.6) |      |
| Elevated   | 126/519  | 36.5 (30.7-42.2) |        | 81/303   | 40.4 (32.5-48.4) |      | 45/216   | 31.0 (23.1-39.0) |      |

**History of heart failure or myocardial infarction**

|          |          |                  |        |          |                  |      |          |                  |      |
|----------|----------|------------------|--------|----------|------------------|------|----------|------------------|------|
| Optimal  | 864/4236 | 33.4 (31.4-35.3) | 0.0002 | 433/1777 | 38.3 (35.2-41.4) | 0.07 | 431/2459 | 29.9 (27.4-32.4) | 0.01 |
| Elevated | 159/569  | 35.9 (31.2-40.7) |        | 102/349  | 38.3 (32.0-44.6) |      | 57/220   | 33.3 (25.7-40.8) |      |

---

The p values for interaction between sex and each risk factor were all <0.0001.

\*overall test comparing sub-distribution hazards across risk categories by Fine and Gray method.

**Lifetime risk of atrial fibrillation according to levels of risk factors**

**Suppl. Table 4.** Lifetime risk of atrial fibrillation by single risk factor and sex, adjusted for the competing risk of death at index age 75 years.

| Risk factor            | All            |                       |          | Men            |                       |          | Women          |                       |          |
|------------------------|----------------|-----------------------|----------|----------------|-----------------------|----------|----------------|-----------------------|----------|
|                        | AF cases/total | Lifetime risk (95%CI) | p value* | AF cases/total | Lifetime risk (95%CI) | p value* | AF cases/total | Lifetime risk (95%CI) | p value* |
| <b>Smoking</b>         |                |                       |          |                |                       |          |                |                       |          |
| Optimal                | 294/1233       | 30.2 (27.1-33.2)      | 0.21     | 88/329         | 36.1 (29.6-42.6)      | 0.25     | 206/904        | 28.2 (24.8-31.6)      | 0.97     |
| Borderline             | 410/1667       | 32.2 (29.4-35.0)      |          | 244/856        | 36.3 (32.3-40.3)      |          | 166/811        | 27.7 (24-31.5)        |          |
| Elevated               | 72/299         | 26.0 (20.6-31.3)      |          | 26/106         | 25.3 (16.7-33.9)      |          | 46/193         | 26.4 (19.5-33.2)      |          |
| <b>Alcohol</b>         |                |                       |          |                |                       |          |                |                       |          |
| Optimal                | 671/2767       | 30.8 (28.7-32.8)      | 0.95     | 303/1100       | 35.2 (31.7-38.6)      | 0.81     | 368/1667       | 28.0 (25.4-30.5)      | 0.59     |
| Elevated               | 105/432        | 30.7 (25.4-36.0)      |          | 55/191         | 35.9 (27.5-44.3)      |          | 50/241         | 26.7 (20.0-33.4)      |          |
| <b>Body mass index</b> |                |                       |          |                |                       |          |                |                       |          |
| Optimal                | 255/1126       | 27.2 (24.2-30.2)      | <0.0001  | 106/364        | 33.9 (28.3-39.6)      | 0.02     | 149/762        | 23.8 (20.3-27.3)      | 0.002    |
| Borderline             | 319/1364       | 30.1 (27.2-33.0)      |          | 164/652        | 32.1 (27.7-36.5)      |          | 155/712        | 28.2 (24.3-32.1)      |          |
| Elevated               | 202/709        | 38.7 (34.2-43.2)      |          | 88/275         | 45.5 (37.8-53.1)      |          | 114/434        | 34.9 (29.4-40.5)      |          |
| <b>Blood pressure</b>  |                |                       |          |                |                       |          |                |                       |          |
| Optimal                | 45/272         | 22.4 (16.4-28.5)      | <0.0001  | 26/117         | 30.5 (19.8-41.3)      | 0.03     | 19/155         | 16.6 (9.6-23.5)       | 0.0005   |
| Borderline             | 140/675        | 25.9 (22.1-29.8)      |          | 66/271         | 29.7 (23.3-36.1)      |          | 74/404         | 23.4 (18.6-28.3)      |          |
| Elevated               | 591/2252       | 33.1 (30.8-35.4)      |          | 266/903        | 37.7 (33.8-41.6)      |          | 325/1349       | 30.3 (27.4-33.2)      |          |

**Lifetime risk of atrial fibrillation according to levels of risk factors**

**Diabetes**

|            |          |                  |      |         |                  |      |          |                  |      |
|------------|----------|------------------|------|---------|------------------|------|----------|------------------|------|
| Optimal    | 580/2249 | 30.1 (28.0-32.3) | 0.59 | 251/810 | 35.3 (31.5-39.1) | 0.76 | 329/1439 | 27.2 (24.6-29.8) | 0.37 |
| Borderline | 110/584  | 31.7 (25.7-37.7) |      | 63/294  | 34.1 (26.0-42.1) |      | 47/290   | 28.6 (20.3-36.8) |      |
| Elevated   | 86/366   | 32.3 (26.1-38.5) |      | 44/187  | 33.8 (25.0-42.6) |      | 42/179   | 31.6 (22.8-40.4) |      |

**History of heart failure or myocardial infarction**

|          |          |                  |       |         |                  |      |          |                  |      |
|----------|----------|------------------|-------|---------|------------------|------|----------|------------------|------|
| Optimal  | 607/2623 | 29.8 (27.7-31.9) | 0.002 | 261/988 | 34.2 (30.6-37.8) | 0.05 | 346/1635 | 27.2 (24.6-29.7) | 0.08 |
| Elevated | 169/576  | 35.1 (30.4-39.8) |       | 97/303  | 38.5 (31.8-45.1) |      | 72/273   | 31.7 (25.1-38.3) |      |

---

p values for interaction between sex and risk profile <0.0001.

\*overall test comparing sub-distribution hazards across risk categories by Fine and Gray method



## Lifetime risk of atrial fibrillation according to levels of risk factors

**Suppl. Table 5.** Distribution of risk factor categories.

| Risk factor profile | Number of elevated<br>risk factors | Number of borderline<br>risk factors | Index age 55 years<br>n=5338 | Index age 65 years<br>n=4805 | Index age 75 years<br>n=3199 |
|---------------------|------------------------------------|--------------------------------------|------------------------------|------------------------------|------------------------------|
| <b>Optimal</b>      | 0                                  | 0                                    | 247 (4.6)                    | 100 (2.1)                    | 33 (1.0)                     |
| <b>Borderline</b>   | 0                                  | 1                                    | 520 (9.7)                    | 279 (5.8)                    | 138 (4.3)                    |
|                     | 0                                  | 2                                    | 549 (10.3)                   | 377 (7.9)                    | 214 (6.7)                    |
|                     | 0                                  | ≥3                                   | 346 (6.7)                    | 265 (5.5)                    | 140 (4.4)                    |
| <b>Elevated</b>     | 1                                  | Any                                  | 1863 (34.9)                  | 1671 (34.8)                  | 1253 (39.2)                  |
|                     | 2                                  | Any                                  | 1220 (22.9)                  | 1355 (28.2)                  | 972 (30.4)                   |
|                     | ≥3                                 | Any                                  | 593 (11.1)                   | 758 (15.8)                   | 449 (14.0)                   |

## Lifetime risk of atrial fibrillation according to levels of risk factors

**Suppl. Table 6.** Lifetime risk of atrial fibrillation by risk factor profile, adjusted for the competing risk of death in men.

| Risk factor profile | Number of elevated risk factors | Number of borderline risk factors | Index age 55 years |                       | Index age 65 years |                       | Index age 75 years |                       |
|---------------------|---------------------------------|-----------------------------------|--------------------|-----------------------|--------------------|-----------------------|--------------------|-----------------------|
|                     |                                 |                                   | AF cases/total     | Lifetime risk (95%CI) | AF cases/total     | Lifetime risk (95%CI) | AF cases/total     | Lifetime risk (95%CI) |
| <b>Optimal</b>      | 0                               | 0                                 | 7/55               | 29.8 (9.7-49.9)       | 4/21               | 28.8 (3.0-54.6)       | 1/5                | 25.0 (0.0-67.4)       |
| <b>Borderline</b>   | 0                               | 1                                 | 21/136             | 42.0 (24.3-59.7)      | 8/61               | 20.1 (7.3-32.9)       | 6/39               | 20.9 (5.9-35.9)       |
|                     | 0                               | 2                                 | 46/255             | 46.0 (33.6-58.5)      | 40/154             | 44.1 (33.2-55.0)      | 19/77              | 29.4 (17.8-41.0)      |
|                     | 0                               | ≥3                                | 27/226             | 28.3 (17.8-38.9)      | 19/144             | 22.0 (12.8-31.3)      | 17/75              | 29.6 (16.5-42.8)      |
| <b>Elevated</b>     | 1                               | Any                               | 150/856            | 43.7 (37.2-50.3)      | 200/715            | 42.3 (37.5-47.1)      | 131/476            | 34.4 (29.2-39.5)      |
|                     | 2                               | Any                               | 139/626            | 41.1 (34.9-47.4)      | 148/618            | 36.5 (31.3-41.7)      | 125/417            | 37.9 (32.2-43.6)      |
|                     | ≥3                              | Any                               | 99/377             | 42.7 (35.4-49.9)      | 116/413            | 39.4 (33.5-45.4)      | 59/202             | 38.6 (30.3-47.0)      |

**Lifetime risk of atrial fibrillation according to levels of risk factors**

**Suppl. Table 7.** Lifetime risk of atrial fibrillation by risk factor profile, adjusted for the competing risk of death in women.

| Risk factor profile | Number of elevated risk factors | Number of borderline risk factors | Index age 55 years |                       | Index age 65 years |                       | Index age 75 years |                       |
|---------------------|---------------------------------|-----------------------------------|--------------------|-----------------------|--------------------|-----------------------|--------------------|-----------------------|
|                     |                                 |                                   | AF cases/total     | Lifetime risk (95%CI) | AF cases/total     | Lifetime risk (95%CI) | AF cases/total     | Lifetime risk (95%CI) |
| <b>Optimal</b>      | 0                               | 0                                 | 11/192             | 20.5 (7.3-33.7)       | 5/79               | 14.9 (2.2-27.6)       | 3/28               | 13.8 (0.0-28.3)       |
| <b>Borderline</b>   | 0                               | 1                                 | 37/384             | 28.8 (19.3-38.3)      | 36/218             | 26.1 (18.4-33.9)      | 12/99              | 16.9 (7.9-26.0)       |
|                     | 0                               | 2                                 | 22/294             | 31.7 (14.4-48.9)      | 25/223             | 21.3 (13.4-29.1)      | 21/137             | 20.2 (12.3-28.1)      |
|                     | 0                               | ≥3                                | 10/120             | 25.3 (8.8-41.8)       | 8/121              | 15.0 (4.6-25.4)       | 12/65              | 27.9 (14.0-41.8)      |
| <b>Elevated</b>     | 1                               | Any                               | 116/1007           | 33.1 (26.6-39.6)      | 173/956            | 30.6 (26.6-34.6)      | 165/777            | 26.2 (22.6-29.7)      |
|                     | 2                               | Any                               | 86/594             | 36.2 (29.0-43.4)      | 165/737            | 35.6 (31.0-40.2)      | 143/555            | 32.7 (28.0-37.3)      |
|                     | ≥3                              | Any                               | 45/216             | 34.7 (26.0-43.3)      | 76/345             | 31.6 (25.5-37.7)      | 62/247             | 31.8 (24.7-39.0)      |

### Lifetime risk of atrial fibrillation according to levels of risk factors

**Suppl. Table 8.** Multivariable prediction model of the lifetime risk of atrial fibrillation at age index 55 years.

|                                          | Coef.    | SE(Coef.) | Covariance | p-value |
|------------------------------------------|----------|-----------|------------|---------|
| Women vs. men                            | -1.30439 | 0.31235   | -0.03434   | 0.0000  |
| Women vs. men x log(t)                   | 0.31037  | 0.11317   |            | 0.0061  |
| Systolic blood pressure (mm Hg)          | 0.00963  | 0.00288   |            | 0.0008  |
| Diastolic blood pressure (mm Hg)         | -0.00739 | 0.00520   |            | 0.1600  |
| Treatment of hypertension                | 0.21862  | 0.08298   |            | 0.0084  |
| Body mass index (kg/m <sup>2</sup> )     | 0.07474  | 0.01878   | -0.00012   | 0.0001  |
| Body mass index x log(t)                 | -0.01629 | 0.00708   |            | 0.0210  |
| Past smoker vs. never smoker             | 0.36787  | 0.29734   | -0.03097   | 0.2200  |
| Past smoker vs. never smoker x log(t)    | -0.12982 | 0.10857   |            | 0.2300  |
| Current smoker vs. never smoker          | 0.91243  | 0.31326   | -0.03393   | 0.0036  |
| Current smoker vs. never smoker x log(t) | -0.33899 | 0.11352   |            | 0.0028  |
| Borderline diabetes vs. optimal diabetes | -0.12940 | 0.09926   |            | 0.1900  |
| Elevated diabetes vs. optimal diabetes   | -0.03556 | 0.13884   |            | 0.8000  |
| History of MI or HF                      | 1.77197  | 0.26611   | -0.02520   | 0.0000  |
| History of MI or HF x log(t)             | -0.62349 | 0.11017   |            | 0.0000  |
| Elevated alcohol vs. optimal alcohol     | 0.25184  | 0.08103   |            | 0.0019  |

We entered the 9 covariates in the model and we did not perform any variable selection.

Coef.: coefficient; SE(Coef): standard error of the coefficient. log(t): natural logarithm of time (years since index age 55 years).

The subdistribution hazard ratio is  $\exp(\text{Coef})$  and the associated 95% confidence interval is from  $\exp[\text{Coef}-1.96*\text{SE}(\text{Coef})]$  to  $\exp[\text{Coef}+1.96*\text{SE}(\text{Coef})]$ .

For sex, BMI, smoking, and history of myocardial infarction or heart failure, one needs to account for the interaction between the covariate Z and log(t). Let us note Coef1 is the coefficient for Z and Coef2 is the coefficient for the interaction between Z and log(t). The subdistribution hazard ratio is  $\exp(\text{Coef1})t^{\text{Coef2}}$ . The 95% confidence interval is from  $\exp[\text{Coef1}+\text{Coef2} \times \log(t)-1.96*\text{SE}\{\text{Coef1}+\text{Coef2} \times \log(t)\}]$  to  $\exp[\text{Coef1}+\text{Coef2} \times \log(t)+1.96*\text{SE}(\text{Coef1}+\text{Coef2} \times \log(t))]$ . The standard error is  $\text{SE}\{\text{Coef1}+\text{Coef2} \times \log(t)\}=\text{sqrt}[\text{SE}(\text{Coef1})^2 + \log(t)^2 \text{SE}(\text{Coef2})^2 + 2 \log(t) \text{Covariance}(\text{Coef1},\text{Coef2})]$

**Lifetime risk of atrial fibrillation according to levels of risk factors**

**Suppl. Table 9.** Lifetime risk AF by single risk factor, unadjusted for the competing risk of death.

| Risk factor                                              | Risk factor | Index age 55 years |                       | Index age 65 years |                       | Index age 75 years |                       |
|----------------------------------------------------------|-------------|--------------------|-----------------------|--------------------|-----------------------|--------------------|-----------------------|
|                                                          |             | AF cases/total     | Lifetime risk (95%CI) | AF cases/total     | Lifetime risk (95%CI) | AF cases/total     | Lifetime risk (95%CI) |
| <b>Smoking</b>                                           | Optimal     | 249/1935           | 56.4 (45.3-67.6)      | 316/1570           | 47.4 (42.1-52.6)      | 294/1233           | 42.3 (37.8-46.7)      |
|                                                          | Borderline  | 343/2275           | 54.3 (46.6-61.9)      | 525/2414           | 53.2 (48.4-57.9)      | 410/1667           | 49.5 (45.0-54.0)      |
|                                                          | Elevated    | 224/1128           | 59.5 (48.6-70.3)      | 182/821            | 61.4 (52.0-70.7)      | 72/299             | 54.4 (42.1-66.7)      |
| <b>Alcohol</b>                                           | Optimal     | 600/4283           | 50.9 (45.3-56.4)      | 799/3857           | 50.2 (46.6-53.7)      | 671/2767           | 46.2 (43.0-49.4)      |
|                                                          | Elevated    | 216/1055           | 74.3 (60.5-88.0)      | 224/948            | 61.1 (52.6-69.6)      | 105/432            | 49.2 (40.3-58.2)      |
| <b>Body mass index</b>                                   | Optimal     | 236/1785           | 49.6 (40.7-58.7)      | 314/1537           | 45.7 (40.8-50.6)      | 255/1126           | 41.9 (37.0-46.9)      |
|                                                          | Borderline  | 343/2136           | 60.6 (49.4-71.9)      | 422/2008           | 53.5 (48.1-58.9)      | 319/1364           | 47.2 (42.4-52.0)      |
|                                                          | Elevated    | 237/1417           | 66.7 (54.4-79.1)      | 287/1260           | 61.5 (54.0-69.1)      | 202/709            | 53.3 (46.9-59.8)      |
| <b>Blood pressure</b>                                    | Optimal     | 152/1539           | 38.4 (30.0-46.8)      | 118/778            | 38.1 (30.7-45.5)      | 45/272             | 34.0 (24.0-43.9)      |
|                                                          | Borderline  | 272/1792           | 58.5 (47.6-69.5)      | 254/1303           | 45.0 (39.5-50.4)      | 140/675            | 37.8 (31.9-43.7)      |
|                                                          | Elevated    | 392/2007           | 66.5 (56.7-76.2)      | 651/2724           | 60.7 (55.9-65.4)      | 591/2252           | 50.8 (47.1-54.6)      |
| <b>Diabetes</b>                                          | Optimal     | 624/3805           | 56.6 (50.0-63.2)      | 726/3137           | 51.1 (47.5-54.6)      | 580/2249           | 45.7 (42.4-49.1)      |
|                                                          | Borderline  | 128/1187           | 53.4 (26.2-80.6)      | 171/1149           | 48.1 (34.3-61.8)      | 110/584            | 48.2 (32.8-63.7)      |
|                                                          | Elevated    | 64/346             | 53.4 (40.6-66.1)      | 126/519            | 60.9 (44.9-76.9)      | 86/366             | 53.2 (40.8-65.7)      |
| <b>History of heart failure or myocardial infarction</b> | Optimal     | 747/5069           | 56.9 (50.4-63.5)      | 864/4236           | 50.9 (47.5-54.4)      | 607/2623           | 44.1 (40.8-47.4)      |
|                                                          | Elevated    | 69/269             | 57.4 (41.5-73.3)      | 159/569            | 61.6 (51.2-72.0)      | 169/576            | 60.7 (52.1-69.4)      |

These results do not account for competing risk of death and overestimates the lifetime risk of atrial fibrillation.

## **Lifetime risk of atrial fibrillation according to levels of risk factors**

## Lifetime risk of atrial fibrillation according to levels of risk factors

**Suppl. Table 10.** Lifetime risk of atrial fibrillation at index age 55 years according to burden of risk factors with multiple imputation.

| Analysis                   | Risk category | Men                   | Women                 |
|----------------------------|---------------|-----------------------|-----------------------|
|                            |               | Lifetime risk (95%CI) | Lifetime risk (95%CI) |
| <b>Multiple imputation</b> | Optimal       | 31.6 (10.3-52.8)      | 23.9 (12.0-35.9)      |
|                            | Borderline    | 36.0 (29.8-42.2)      | 30.0 (24.4-35.7)      |
|                            | Elevated      | 39.2 (36.4-42.0)      | 31.1 (28.3-33.8)      |
| <b>Complete case</b>       | Optimal       | 29.8 (9.7-49.9)       | 20.5 (7.3-33.7)       |
|                            | Borderline    | 39.7 (31.7-47.7)      | 28.0 (20.6-35.4)      |
|                            | Elevated      | 43.3 (38.4-46.2)      | 34.6 (30.3-39.0)      |

In the multiple imputation analysis, we included 6778 participants among which 1201 developed atrial fibrillation during follow-up. The mean percentage of individuals belonging to optimal, borderline, and elevated groups were 4.1%, 24.7%, and 71.2% respectively across 25 imputed datasets. Among those 6778 participants, 5338 participants (489 AF cases) didn't have any missing data for the risk factors and were included in the complete case analysis.

**Lifetime risk of atrial fibrillation according to levels of risk factors**

**Suppl. Table 11.** Lifetime risk of atrial fibrillation by BMI adjusted for the competing risk of death excluding underweighted individuals.

| Risk Factor            |            | Index age 55 years |                       | Index age 65 years |                       | Index age 75 years |                       |
|------------------------|------------|--------------------|-----------------------|--------------------|-----------------------|--------------------|-----------------------|
|                        |            | AF cases/total     | Lifetime risk (95%CI) | AF cases/total     | Lifetime risk (95%CI) | AF cases/total     | Lifetime risk (95%CI) |
| <b>Body mass index</b> | Optimal    | 233/1751           | 31.8 (27.7-36.0)      | 309/1493           | 30.3 (27.3-33.3)      | 247/1082           | 27.4 (24.4-30.5)      |
|                        | Borderline | 343/2136           | 38.2 (34.0-42.4)      | 422/2008           | 33.3 (30.5-36.1)      | 319/1364           | 30.1 (27.2-33.0)      |
|                        | Elevated   | 237/1417           | 44.2 (38.5-50.0)      | 287/1260           | 40.7 (36.7-44.8)      | 202/709            | 38.7 (34.2-43.2)      |

The number of underweighted (BMI<18.5 kg/m<sup>2</sup>) individuals excluded from the optimal category were 34, 44, and 44 for index age 55 years, index age 65 years, and index age 75 years respectively.



## Lifetime risk of atrial fibrillation according to levels of risk factors

### References

- 1 Fine JP, Gray RJ. A Proportional Hazards Model for the Subdistribution of a Competing Risk. *J Am Stat Assoc* 1999;**94**:496–509.
- 2 Li J, Scheike TH, Zhang M-J. Checking Fine and Gray subdistribution hazards model with cumulative sums of residuals. *Lifetime Data Anal* 2015;**21**:197–217.
- 3 Zhou B, Fine J, Laird G. Goodness-of-fit test for proportional subdistribution hazards model. *Stat Med* 2013;**32**:3804–11.
- 4 Wolbers M, Koller MT, Wittteman JCM, *et al.* Prognostic models with competing risks: methods and application to coronary risk prediction. *Epidemiol Camb Mass* 2009;**20**:555–61.
- 5 Putter H, Fiocco M, Geskus RB. Tutorial in biostatistics: competing risks and multi-state models. *Stat Med* 2007;**26**:2389–430.
- 6 Wolbers M, Blanche P, Koller MT, *et al.* Concordance for prognostic models with competing risks. *Biostat Oxf Engl* 2014;**15**:526–39.
- 7 White IR, Royston P, Wood AM. Multiple imputation using chained equations: Issues and guidance for practice. *Stat Med* 2011;**30**:377–99.
- 8 White IR, Royston P. Imputing missing covariate values for the Cox model. *Stat Med* 2009;**28**:1982–98.
- 9 Rubin DB. *Multiple Imputation for Nonresponse in Surveys*. Wiley 1987.
